# Supplementary material
Source: publisher site journal article supplement (https://www.dovepress.com/get_supplementary_file.php?f=424061.xlsx)
Supplement: Supplementary file 1 [file get_supplementary_file.php]

## Sheet: Table S1
Table S1. The pathogens detected by mNGS
Taxonomy	Abbreviation	Full name
Bacteria	K. pneumoniae	Klebsiella pneumoniae
	A. baumannii	Acinetobacter baumannii
	S. aureus	Staphylococcus aureus
	P. aeruginosa	Pseudomonas aeruginosa
	S. pneumoniae	Streptococcus pneumoniae
	E. faecalis	Enterococcus faecalis
	C. striatum	Corynebacterium striatum
	S. maltophilia	Stenotrophomonas maltophilia
	E. coli	Escherichia coli
	H. influenzae	Haemophilus influenzae
	MTBC	Mycobacterium tuberculosis complex
	C. striatum	Corynebacterium striatum
	S. maltophilia	Stenotrophomonas maltophilia
	E. faecalis	Enterococcus faecalis
	B. neointestinalis	Burkholderia neointestinalis
	H. Bacteroides	Heparinolytic Bacteroides
	M. Prevotella	Mouth Prevotella
	M. microflora	Micrococcus microflora
	M. fragilis	Mycobacterium fragilis
	U. urealyticum	Ureaplasma urealyticum
	R. pseudomallei	Rhodobacter pseudomallei
	S. marcescens	Serratia marcescens
	P. gingivalis	Porphyromonas gingivalis
	E. albicans	Enterobacter albicans
	M. timidum	Mogibacterium timidum
	B. multivorans	Burkholderia multivorans
	M. chelonei	mycodacterium chelonei
	S. oralis	Streptococcus oralis
	E.raffinosus	Enterococcus raffinosus
	S. thermophilus	Streptococcus thermophilus
	C. rectus	campylobacter rectus
	C. indologenes	Chryseobacterium indologenes
	F. magna	Finegoldia magna
	F. nucleatum	Fusobacterium nucleatum
	M. catarrhalis	Moraxella catarrhalis
	M. monacense	Mycobacterium monacense
	R. mucilaginosa	Rothia mucilaginosa
	M. abscessus	Mycobacterium abscessus
	M. chimera	Mycobacterium chimera
	P. mirabilis	Proteus mirabilis
	M. hominis	Mycoplasma hominis
	L. pneumophila	Legionella pneumophila
	B. cenocepacia	Burkholderia cenocepacia
	E. cloacae	Enterobacter cloacae
Fungi	C. albicans	Candida albicans
	A. fumigatus	Aspergillus fumigatus
	P. jiroveci	Yersinia pneumoniae
	C. glabrata	Candida glabrata
	A. flavus	Aspergillus flavus
	C. tropicalis	Candida tropicalis
	A. niger	Aspergillus niger
	R. microsporum	Rhizopus microsporum
	C. neoformans	Cryptococcus neoformans
	T. asahii	Trichosporon asahii
	C. parapsilosis	Candida parapsilosis
	R. pusillus	Rhizomucor pusillus
	R.delemar	Rhigopus delemar
	L.ramosa	Lichtheimia ramosa
	S.apiospermum	Scedosporium apiospermum
	A.lentulus	Aspergillus lentulus
	C.nivariensis	Candida nivariensis
	A.terreus	Aspergillus terreus
Virus	HSV1	Human herpesvirus type 1
	EBV	Human herpesvirus type 4
	CMV	Human herpesvirus type 5
	HCoV-OC43	Human coronavirus OC43
	HPIV-2	Human parainfluenza virus type 2
	RV-A	Rhinovirus type A
	HPIV-3	Human parainfluenza virus type 3
	HCoV-HKU1	Human coronavirus HKU1
